# Supplementary material
Source: PubMed Central journal article supplement (PMC2002539)
Supplement: 7400962-s1.pdf [file 7400962-s1.pdf]

Figure S1

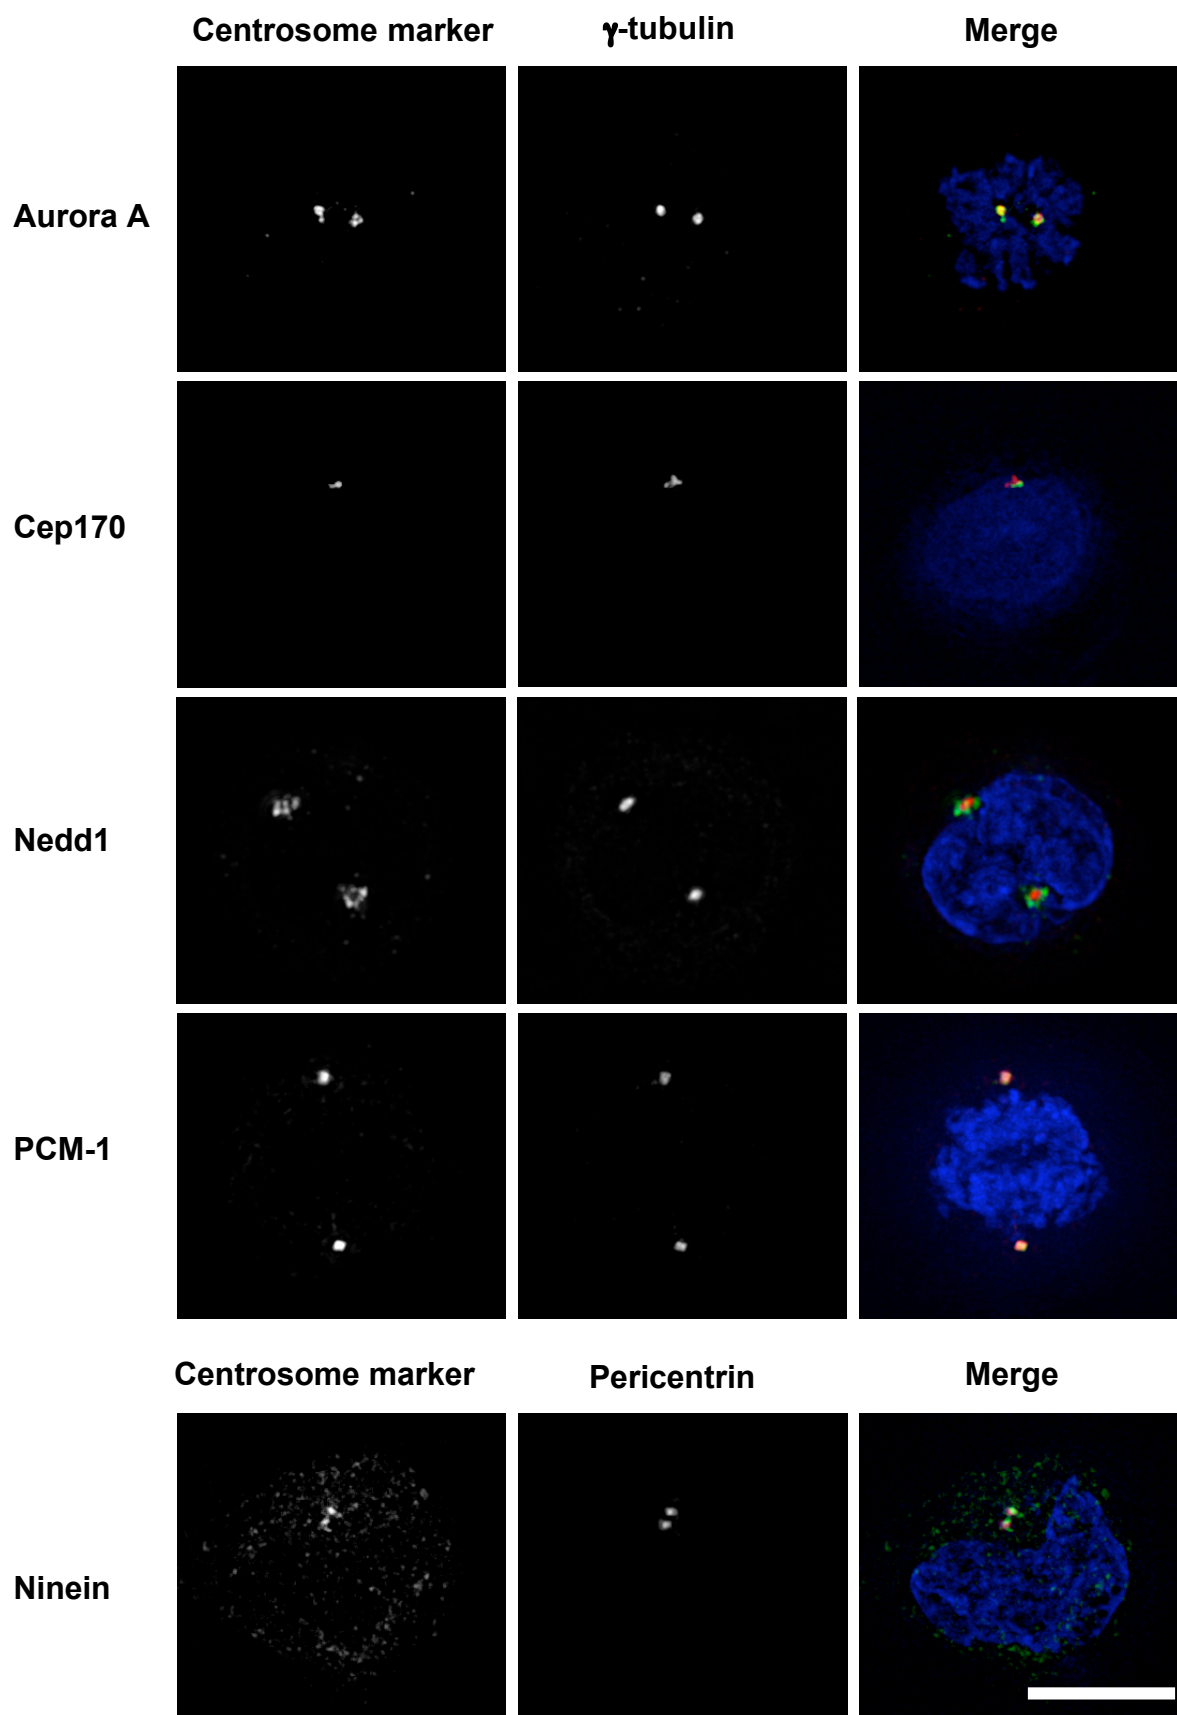

## **SUPPLEMENTARY FIGURE LEGEND**

### **Figure S1 Control localisation of centrosomal proteins to centrosomes in human lymphoblastoid cells**

Cells were stained with antibodies to the indicated centrosomal or pericentrosomal proteins (green) and to  $\gamma$ -tubulin or pericentrin (red), then counter-stained with DAPI (blue). Scale bars are 10  $\mu$ m.
